# Supplementary material for: On the Close Relatedness of Two Rice-Parasitic Root-Knot Nematode Species and the Recent Expansion of Meloidogyne graminicola in Southeast Asia
Source: MDPI journal article supplement (doi:10.3390/genes10020175), 2019-02-25
Supplement: s1 [file s1]

# Supplementary Information

## On the close relatedness of two rice-parasitic root-knot nematode species and the recent expansion of *Meloidogyne graminicola* in Southeast Asia

Guillaume Besnard, Ngan ThiPhan, Hai Ho Bich, Alexis Dereeper, Hieu Trang Nguyen,  
Patrick Quénéhervé, Jamel Aribi and Stéphane Bellafiore

### Supplementary information includes the following items:

**Supplementary methods 1.** Reference genomes used to screen contaminants

**Supplementary methods 2.** Estimation of genome size and depth of sequencing

**Figure S1.** *k*-mers distribution of *M. graminicola* and *M. oryzae* genomes at *k* = 15, 19, 23 and 27

**Figure S2.** Comparative alignment of repeated elements composing the 65R/94R/63R mitogenomic region of *M. oryzae*, *M. graminicola* and *M. incognita*, respectively

**Figure S3.** Linearized representation of mitogenomes of *M. oryzae* and *M. graminicola*

**Figure S4.** Reduced-median network of *Meloidogyne graminicola* mitochondrial haplotypes including the information of heteroplasmic sites

**Figure S5.** Distribution of sequence polymorphisms between ribotype I and II along the whole nrDNA cluster of *M. graminicola* and *M. oryzae*

**Figure S6.** Phylogenetic relationships within *Meloidogyne* species based on ITS

**Table S1.** Origin and genome sequencing data summary generated in this study for each nematode isolate

**Table S2.** Accession numbers of mitochondrial genes of *M. hapla* and *M. floridensis*

**Table S3.** Diversity of mitochondrial genomes between and within the *Meloidogyne* species

**Table S4.** Position of SNPs, indels and heteroplasmic sites within the *M. graminicola* mitogenome among 13 isolates

**Table S5.** Assessment of the assembly completeness of available *Meloidogyne graminicola* genome and transcriptome

**Table S6.** Sequence identity between each type of homolog for the three nuclear regions investigated

**Table S7.** Sequencing depth of each type of homolog for the nuclear genomic regions TAA6 and ACC6 among 12 *M. graminicola* and two *M. oryzae* isolates

### References

## Supplementary methods

### 50 **Supplementary methods 1.** Reference genomes used to screen contaminants

Reference genomes used to screen contaminants include (1) NCBI RefSeq bacterial genomes (70,293 entries as of 8 December 2016), (2) NCBI GenBank fungal genomes (2,314 entries as of 4 May 2017), rice genomes (IRGSP-1.0\_genome and nippon\_ir64 from Schatz laboratory), human genome (GRCh38/hg38) and the mitogenomes presented in this work.

55

### **Supplementary methods 2.** Estimation of genome size and depth of sequencing

$k$ -mers are nucleotide sequences that can be extracted directly from sequencing reads by a sliding window of length  $k$ . For novel genome,  $k$ -mer analysis can reveal some insights in terms of structure and complexity. Hereafter, read length is denoted as  $L$ , total number of reads as  $N$ , haploid genome size as  $G$ , sequencing depth as  $S$ , and  $D$  as average homozygous coverage. We excluded  $k$ -mers with coverage out of range 5 to 1,000, denoted as  $B$ . Based on the hypothesized ploidy,  $D$  is determined from the average unique heterozygous  $\lambda$ . In our case, if *M. graminicola* is deemed as diploid and *M. oryzae* as triploid, the average homozygous coverage is  $2\lambda$  and  $3\lambda$ , respectively [1]. Repetitive homozygous  $k$ -mers, used to calculate repeat proportion, have coverage of more than  $6 * \lambda$ .  
65 Considering heterozygosity rate as the probability of a heterozygous nucleotide, we can indirectly estimate it via the number of unique heterozygous  $k$ -mers.  $G$  and  $S$  are calculated as follows:

$$G = \frac{N * (L - K + 1) - B}{D}$$

70

$$S = \lambda * \frac{L}{L - K + 1}$$

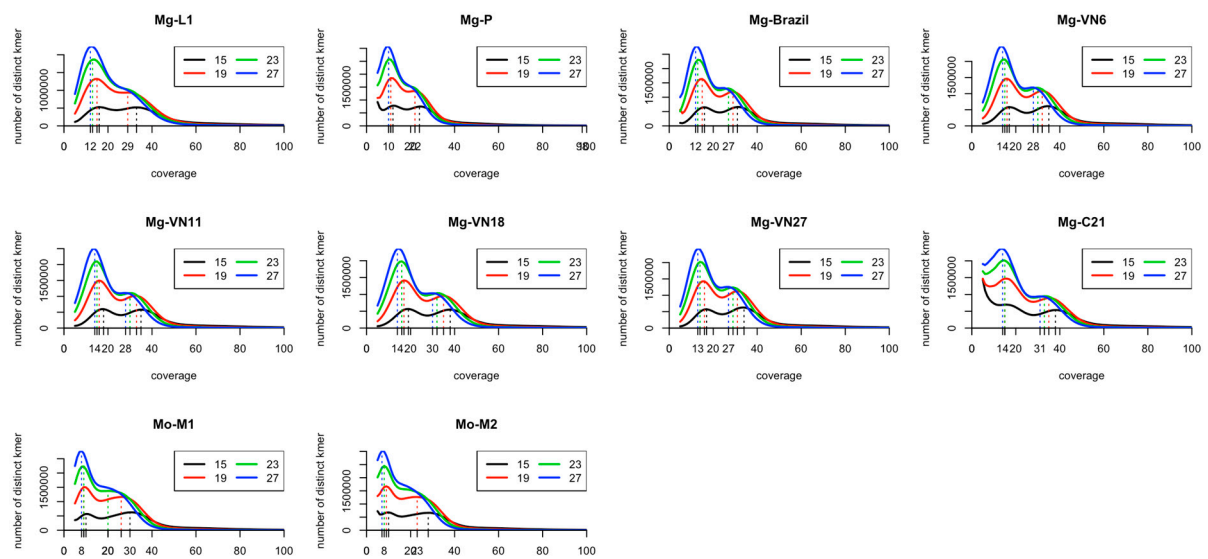

**Figure S1.**  $k$ -mers distribution of the *M. graminicola* and *M. oryzae* genomes at  $k = 15, 19, 23$  and  $27$ . Histogram curves for  $k = 27$  (blue curve),  $k = 23$  (green curve),  $k = 19$  (red curve) and  $k = 15$  (black curve).

*M. graminicola* (NC 024275.1) **TTTCAATATAAGTAATTAATAACTATTAATCACTTCTATATTATTAATAAATTATTATTTATTAA** **TTTATATTAAATAAATTATTATTTATTAA**  
*M. oryzae* Suriname **TTTCAATATAAGTAATTAATAACTATTAATACTTCTATATTATTAATAAATTATTATTTATTAA** - - - - -  
*M. incognita* (NC 024097.1) **TAAATTACGAAAAATTAAGTTTAGATTATTTTGTAAAATTATTGTTAAATGTAAATTAGAAAA** **TAAATTACGAAAAATTAAGTTTAGATTATTTT**  
 \*  
*M. graminicola* (NC 024275.1) **TTTCAATATAAGTAATTAATAACTATTAATTACTTCTATATTATTAATAAATTATTATTTATTAA** **TTTATATTAAATAAATTATTATTTATTAA**  
*M. oryzae* Suriname **TTTCAATATAAGTAATTAATAACTATTAATACTTCTATATTATTAATAAATTATTATTTATTAA** - - - - -  
*M. incognita* (NC 024097.1) **TGTAAAATTATTGTTAAATGTAAATTAGAAAA** **TAAATTACGAAAAATTAAGTTTAGATTATTTTGTAAAATTATTGTTAAATGTAAATTAGAAA**  
 \*  
*M. graminicola* (NC 024275.1) **TTTCTATATAAGTAATTAATAACTATTAATCACTTCTATATTATTAATAAATTATTATTTATTAA** **TTTATATTAAATAAATTATTATTTATTAA** **AATAGTTATTTAT**  
*M. oryzae* Suriname **TTTCAATATAAGTAATTAATAACTATTAATTACTTCTATATTATTAATAAATTATTATTTATTAA** - - - - -  
*M. incognita* (NC 024097.1) **ATAATTACGAAAAATTAAGTTTAGATTATTTTGTAAAATTATTGTTAAATGTAAATTAGAAAA** **TAAATTACGAAAAATTAAGTTTAGATTATTT**  
 \*  
*M. graminicola* (NC 024275.1) - - - - -  
*M. oryzae* Suriname - - - - -  
*M. incognita* (NC 024097.1) **TGTAAAATTATTGTTAAATGTAAATTAGAAAA** **TAAATTACGAAAAATTAAGTTTAGATTATTTTGTAAAATTATTGTTAAATGTAAATTAGAA**  
  
*M. graminicola* (NC 024275.1) - - - - -  
*M. oryzae* Suriname - - - - -  
*M. incognita* (NC 024097.1) **AA** **TAAATTACGAAAAATTAAGTTTAGATTATTTTGTAAAATTATTGTTAAATGTAAATTAGAAAA** **TAAATTACGAAAAATTAAGTTTAGATTATT**  
  
*M. graminicola* (NC 024275.1) - - - - -  
*M. oryzae* Suriname - - - - -  
*M. incognita* (NC 024097.1) **TTTGTAAAATTATTGTTAAATGTAAATTAGAAAA** **TAAATTACGAAAAATTAAGTTTAGATTATTTTGTAAAATTATTGTTAAATGTAAATTAGA**  
  
*M. graminicola* (NC 024275.1) - - -  
*M. oryzae* Suriname - - -  
*M. incognita* (NC 024097.1) **AA T**

85 **Figure S2.** Comparative alignment of repeated elements composing the 65R/94R/63R mitogenomic region of *M. oryzae* (Mo, this study), *M. graminicola*  
 (Mg, NC\_024275.1) and *M. incognita* (NC 024097.1), respectively. The boxes indicate the repeated elements in each species. Three repeated 65-bp elements  
 in *M. oryzae* overlap with 94R region in *M. graminicola* which includes two repeated 94-bp elements and one 81-bp element. At position 31 of the 94-bp  
 element, a variable site (C, A or T) was found between repeats for all Mg and Mo populations. For the three repeats, Mg got respectively the nucleotides C-T-  
 C and Mo A-T-T. Therefore at position 31 of the first and third repeats, a specific nucleotide is found for Mg and Mo. The variable site at position 31 of the  
 94-bp and 65-bp element is indicated in bold and with a \* below the position. The repeated elements of *M. incognita* display very different sequence (that  
 90 cannot be properly aligned) compared with the two other species.

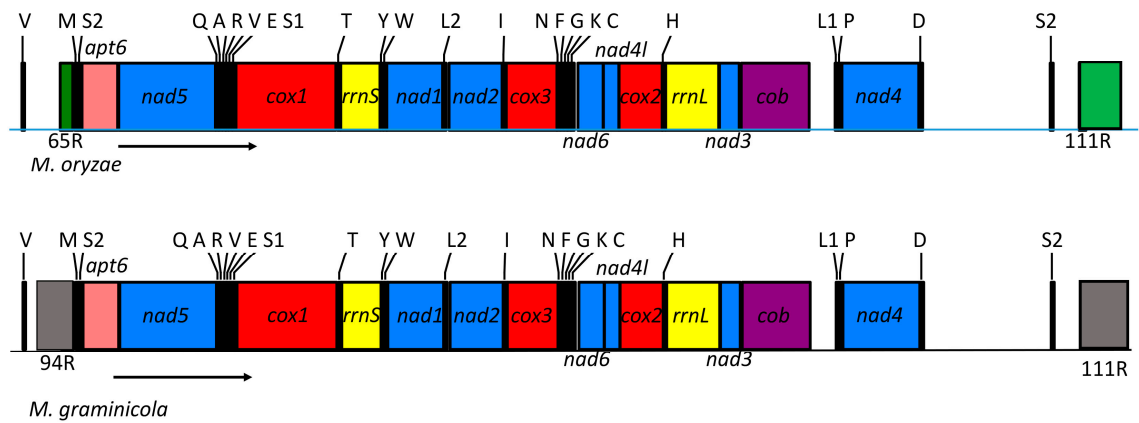

**Figure S3.** Linearized representation of mitogenomes of *M. oryzae* (this study) and *M. graminicola* (NC\_024275.1). Gene and genome size are not drawn to scale. The arrows indicate the direction of the transcription for all genes. The tRNAs are shown by single-letter abbreviation (on the tick marks; see also Besnard et al. [2]).

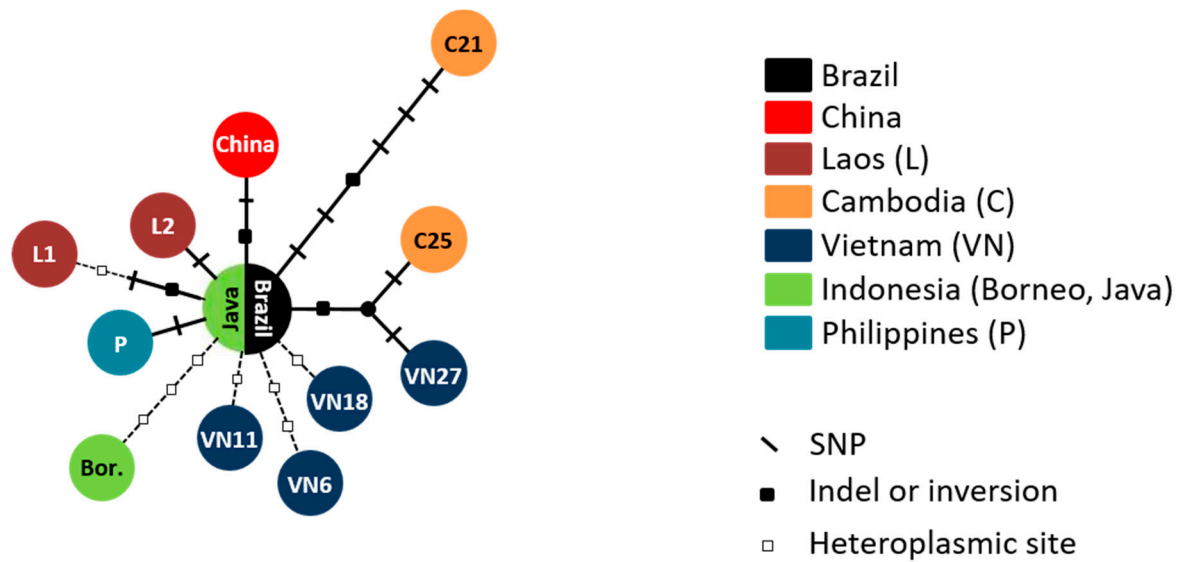

100

105

**Figure S4.** Reduced-median network of *Meloidogyne graminicola* mitochondrial haplotypes including the information of heteroplasmic sites. The network was reconstructed with Network v.5 [3], using the 13 available nematode mitogenome sequences, excluding the 111R region. The nematode populations are indicated in the circles and their geographic origin is displayed by different colors. The number of mutations is shown on the branches with slashes, black squares and white squares that respectively indicate SNPs, indels/inversion and heteroplasmic sites.

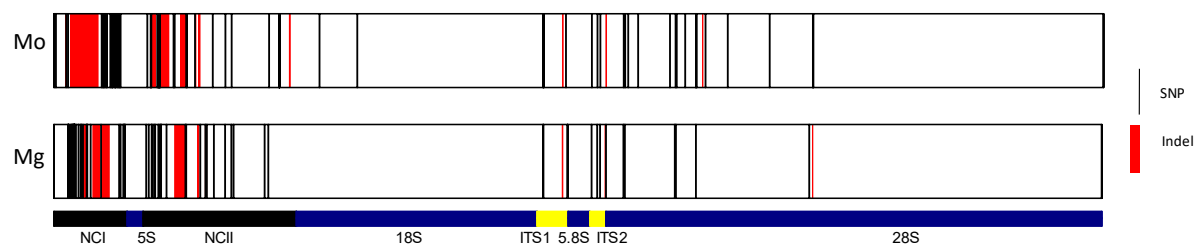

110

**Figure S5.** Distribution of sequence polymorphisms (SNP or indel) between ribotype I and II along the whole nrDNA cluster of *M. graminicola* (Mg) and *M. oryzae* (Mo)

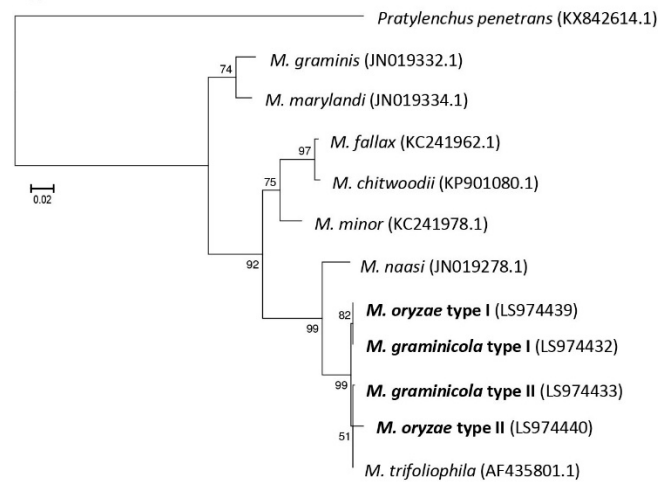

**Figure S6.** Phylogenetic relationships within *Meloidogyne* species based on ITS using the GTR + G model. Bootstrap values greater than 50% are given on appropriate clades in the Maximum Likelihood tree presented. GenBank sequences are indicated in parenthesis, and sequences from this study are in bold font. The phylogeny is rooted with *Pratylenchus penetrans* as an outgroup. Scale bar represents 0.02 substitutions per nucleotide position.



125 **Table S1.** Origin and genome sequencing data summary generated in this study for each nematode isolate

| Isolates                              | Abbreviation | Origin        | Number of paired-end reads | Number of cleaned paired-end reads | Read length (bp) | MtDNA sequence depth* | Mitogenome size without 111R (bp) |
|---------------------------------------|--------------|---------------|----------------------------|------------------------------------|------------------|-----------------------|-----------------------------------|
| <i>Meloidogyne graminicola</i> VN6    | Mg-VN6       | Vietnam       | 8,187,318                  | 7,591,266                          | 100              | 1,632× ± 390          | 16,809                            |
| <i>Meloidogyne graminicola</i> VN11   | Mg-VN11      | Vietnam       | 8,613,889                  | 7,873,320                          | 100              | 1,885× ± 477          | 16,810                            |
| <i>Meloidogyne graminicola</i> VN18   | Mg-VN18      | Vietnam       | 9,191,522                  | 8,397,190                          | 100              | 1,951× ± 513          | 16,810                            |
| <i>Meloidogyne graminicola</i> VN27   | Mg-VN27      | Vietnam       | 8,149,454                  | 7,568,959                          | 100              | 1,742× ± 370          | 16,905                            |
| <i>Meloidogyne graminicola</i> L1     | Mg-L1        | Laos          | 6,903,524                  | 6,367,740                          | 125              | 3,772× ± 764          | 16,810                            |
| <i>Meloidogyne graminicola</i> L2     | Mg-L2        | Laos          | 7,639,080                  | NA                                 | 125              | 197× ± 93             | 16,811                            |
| <i>Meloidogyne graminicola</i> C21    | Mg-C21       | Cambodia      | 8,728,853                  | 7,295,797                          | 125              | 1,571× ± 533          | 16,813                            |
| <i>Meloidogyne graminicola</i> C25    | Mg-C25       | Cambodia      | 13,173,663                 | NA                                 | 125              | 462× ± 211            | 16,905                            |
| <i>Meloidogyne graminicola</i> Java2  | Mg-Java      | Indonesia     | 13,657,194                 | NA                                 | 125              | 74× ± 34              | 16,811                            |
| <i>Meloidogyne graminicola</i> Borneo | Mg-Borneo    | Indonesia     | 8,448,369                  | NA                                 | 125              | 836× ± 95             | 16,808                            |
| <i>Meloidogyne graminicola</i> P      | Mg-P         | Philippines   | 7,762,138                  | 6,146,083                          | 100              | 1,506× ± 355          | 16,811                            |
| <i>Meloidogyne graminicola</i> Brazil | Mg-Brazil    | Brazil        | 8,440,215                  | 7,347,384                          | 100              | 1,832× ± 389          | 16,811                            |
| <i>Meloidogyne oryzae</i> M1          | Mo-M1        | French Guiana | 8,559,374                  | 7,900,790                          | 100              | 794× ± 207            | 17,069                            |
| <i>Meloidogyne oryzae</i> M2          | Mo-M2        | Suriname      | 8,316,341                  | 7,662,197                          | 100              | 1,363× ± 298          | 17,066                            |

\*sequencing depth for the mitogenome assembly with standard deviation

**Table S2.** Accession numbers of mitochondrial genes of *M. hapla* and *M. floridensis*

| Genes        | <i>M. hapla</i> <sup>1</sup> | <i>M. floridensis</i> <sup>2</sup> |
|--------------|------------------------------|------------------------------------|
| <i>cox1</i>  | ABLG01002664.1               | nMf.1.0.scaf04464                  |
| <i>rrnS</i>  | ABLG01002664.1               | nMf.1.0.scaf04464                  |
| <i>cox3</i>  | BM884076.1                   | nMf.1.0.scaf14978                  |
| <i>nad4L</i> | -                            | nMf.1.0.scaf14978                  |
| <i>nad3</i>  | L76262.1                     | nMf.1.0.scaf13075                  |
| <i>nad4</i>  | -                            | nMf.1.0.scaf13075                  |
| <i>nad5</i>  | ABLG01002664.1               | nMf.1.0.scaf04464                  |

<sup>1</sup>For *M. hapla*, the accession number of genes/contigs were retrieved from GenBank using Nematode BLAST Server (<http://xyala.cap.ed.ac.uk/services/blastserver/>)

<sup>2</sup>For *M. floridensis*, the scaffolds containing mitochondrial genes were searched using BLAST in the 959 nematode genome database (<http://xyala.cap.ed.ac.uk/downloads/959-nematodegenomes/blast/blast.php>)

**Table S3.** Diversity of mitochondrial genomes (excluding 111R) between and within the *Meloidogyne* species

| Species                                                   | Number of SNPs | Number of indels and inversion |
|-----------------------------------------------------------|----------------|--------------------------------|
| <i>M. graminicola</i> (Mg-P) vs. <i>M. oryzae</i> (Mo-M2) | 619            | 58                             |
| Between two <i>M. oryzae</i> isolates                     | 6              | 5                              |
| Among 13 <i>M. graminicola</i> isolates*                  | 11             | 4                              |

\* including a Chinese isolate (KJ139963)

**Table S4.** Position of SNPs, indels and heteroplasmic sites within the *M. graminicola* mitogenome among 13 isolates

| Isolate                      | 15743 | 16549 | 16724 | 16726 | 16831-16833 | 17099 | 17325 | 17486 | 17512 | 17774  | Position site (location)* |           |           | 789       | 912      | 1245     | 2386     | 4144      | 6728   | 8632      | 9224   | 10642 | 11809        |
|------------------------------|-------|-------|-------|-------|-------------|-------|-------|-------|-------|--------|---------------------------|-----------|-----------|-----------|----------|----------|----------|-----------|--------|-----------|--------|-------|--------------|
|                              | (NCR) | (NCR) | (NCR) | (NCR) | (NCR)       | (NCR) | (NCR) | (NCR) | (NCR) | (atp6) | (atp6)                    | (atp6)    | (nad5)    | (cox1)    | (cox1)   | (cox1)   | (nad1)   | (cox3)    | (rrnL) | (cob)     | (nad4) | (NCR) | (NCR)        |
| Mg-VN6                       |       |       |       |       |             |       |       |       |       |        | R (A76; G24)              |           |           |           |          |          |          |           |        |           |        |       | R (81A; 19G) |
| Mg-VN11                      |       |       |       |       |             |       |       |       |       |        |                           |           |           |           |          |          |          |           |        |           |        |       | Y (T66; C34) |
| Mg-VN18                      |       |       |       |       |             |       |       |       |       |        |                           |           |           |           |          |          |          |           |        |           |        |       |              |
| Mg-VN27                      |       | T     |       |       |             |       |       |       |       |        |                           |           |           |           |          |          |          |           |        |           |        |       |              |
| Mg-L1                        |       |       |       |       |             |       |       |       |       |        |                           |           |           |           |          |          |          |           |        |           |        |       |              |
| Mg-L2                        |       |       |       |       |             |       |       |       |       |        |                           |           |           |           |          |          |          |           |        |           |        |       |              |
| Mg-C21                       |       |       |       |       |             |       |       |       |       |        |                           |           |           |           |          |          |          |           |        |           |        |       |              |
| Mg-C25                       |       |       |       |       |             |       |       |       |       |        |                           |           |           |           |          |          |          |           |        |           |        |       |              |
| Mg-Borneo                    |       |       |       |       |             |       |       |       |       |        |                           |           |           |           |          |          |          |           |        |           |        |       |              |
| Mg-Java                      |       |       |       |       |             |       |       |       |       |        |                           |           |           |           |          |          |          |           |        |           |        |       |              |
| Mg-P (NC_024275)             |       |       |       |       |             |       |       |       |       |        |                           |           |           |           |          |          |          |           |        |           |        |       |              |
| Mg-Brazil                    |       |       |       |       |             |       |       |       |       |        |                           |           |           |           |          |          |          |           |        |           |        |       |              |
| Mg-China (KJ139963.1)        |       |       |       |       |             |       |       |       |       |        |                           |           |           |           |          |          |          |           |        |           |        |       |              |
| Consensus sequence           | -     | C     | T     | C     | GGA         | G     | -     | T     | C     | G      | C                         | -         | A         | T         | A        | A        | A        | A         | T      | T         | A      | C     | A            |
| Silent/non silent mutation** | -     | -     | -     | -     | -           | -     | -     | -     | -     | silent | silent                    | Phe->Leu2 | Leu2->Phe | Pro->Ser2 | Asn->Asp | Ser->Gly | Thr->Ala | Asn->Ser1 | -      | Phe->Ser2 | silent | -     | -            |

145     The 111R from each population was removed before to proceed to alignment. Therefore, positions 1 and 16,910 of the proposed alignment correspond respectively to the nucleotide number 15,668 and 12,449 from the mitochondrial circular reference genome (NC\_024275.1 [2]). The list was established without consideration of variation in mononucleotide stretches (poly A and poly T). The percent of each nucleotide variant for a heteroplasmic position is given in parenthesis.

\* in *M. graminicola*-NC\_024275

150     \*\* for protein-coding gene only

**Table S5.** Assessment of the assembly completeness of available *Meloidogyne graminicola* genome and transcriptome. This analysis was performed with BUSCO v.3 (Benchmarking Universal Single-Copy Orthologs [4]). The BUSCO dataset “Eukaryota odb9”, which includes 303 Eukaryote single-copy orthologs, was used as the reference.

|                                 | Draft genome [5] | Transcriptome [6] |
|---------------------------------|------------------|-------------------|
| Assembly size (Mb)              | 38.18            | 61.08             |
| Number of scaffolds/transcripts | 4,304            | 66,396            |
| N50 value (kb)                  | 20.4             | 0.4               |
| Complete (%)                    | 73.6             | 88.1              |
| Complete and single-copy (%)    | 72.6             | 35.0              |
| Complete and duplicated (%)     | 1.0              | 53.1              |
| Fragmented (%)                  | 15.2             | 7.6               |
| Missing (%)                     | 11.2             | 4.3               |

**Table S6.** Sequence identity (1 – *p*-distance, in %) between each type of homolog for the three nuclear regions investigated: **A)** nuclear ribosomal DNA (nrDNA) cluster (nucleotide alignment of 7,932 bp), **C)** TAA6 region (nucleotide alignment of 6,546 bp), and **D)** ACC6 region (nucleotide alignment of 6,473 bp). Mg = *Meloidogyne graminicola*; Mo = *M. oryzae*. Intraspecific sequence comparisons are given in green and blue, for Mg and Mo, respectively. Interspecific comparisons are in black

**A)**

| <b>nrDNA</b> | <b>Mg Type II</b> | <b>Mo Type I</b> | <b>Mo Type III</b> |
|--------------|-------------------|------------------|--------------------|
| Mg Type I    | 99.29%            | <b>100.00%*</b>  | 99.25%             |
| Mg Type II   |                   | 99.38%           | 98.99%             |
| Mo Type I    |                   |                  | <b>99.34%</b>      |

**B)**

| <b>TAA6</b> | <b>Mg Type II</b> | <b>Mo Type I</b> | <b>Mo Type III</b> |
|-------------|-------------------|------------------|--------------------|
| Mg Type I   | 98.36%            | <b>99.98%*</b>   | 98.06%             |
| Mg Type II  |                   | 98.38%           | 97.84%             |
| Mo Type I   |                   |                  | <b>98.07%</b>      |

**C)**

| <b>ACC6</b> | <b>Mg Type II</b> | <b>Mo Type I</b> | <b>Mo Type III</b> | <b>Mo Type IV</b> |
|-------------|-------------------|------------------|--------------------|-------------------|
| Mg Type I   | 97.61%            | <b>99.95%*</b>   | 98.12%             | 97.79%            |
| Mg Type II  |                   | 97.62%           | 97.65%             | 97.99%            |
| Mo Type I   |                   |                  | <b>98.14%</b>      | <b>97.81%</b>     |
| Mo Type III |                   |                  |                    | <b>97.91%</b>     |

\* Note that sequences of Type I from *M. graminicola* and *M. oryzae* are almost identical for the three genomic regions

165 **Table S7.** Sequencing depth (with standard deviation) of each type of homolog for the nuclear genomic regions TAA6 and ACC6 among 12 *M. graminicola* and two *M. oryzae* isolates. The size of each sequence type (in bp) is also given for each species.

| Taxa                  | TAA6        |             |             | ACC6        |             |             |             |
|-----------------------|-------------|-------------|-------------|-------------|-------------|-------------|-------------|
|                       | Type I      | Type II     | Type III    | Type I      | Type II     | Type III    | Type IV     |
| <i>M. graminicola</i> | (6,361 bp)  | (6,399 bp)  | -           | (6,151 bp)  | (6,310 bp)  | -           | -           |
| - Mg-VN6              | 16.4× ± 5.1 | 16.5× ± 5.9 | -           | 19.2× ± 4.6 | 18.8× ± 4.5 | -           | -           |
| - Mg-VN11             | 18.4× ± 5.7 | 18.2× ± 5.3 | -           | 20.8× ± 4.1 | 20.4× ± 4.9 | -           | -           |
| - Mg-VN18             | 20.6× ± 6.2 | 21.7× ± 7.0 | -           | 21.5× ± 5.0 | 21.9× ± 4.8 | -           | -           |
| - Mg-VN27             | 16.4× ± 4.4 | 17.4× ± 5.2 | -           | 19.4× ± 5.4 | 19.6× ± 4.9 | -           | -           |
| - Mg-L1               | 22.2× ± 6.7 | 21.7× ± 7.7 | -           | 19.9× ± 5.2 | 19.9× ± 5.7 | -           | -           |
| - Mg-L2               | 10.2× ± 4.7 | 9.5× ± 4.1  | -           | 11.6× ± 3.5 | 9.4× ± 2.9  | -           | -           |
| - Mg-C21              | 20.9× ± 6.9 | 20.8× ± 7.2 | -           | 19.9× ± 4.9 | 20.3× ± 4.9 | -           | -           |
| - Mg-C25              | 12.7× ± 5.6 | 13.6× ± 6.6 | -           | 14.8× ± 4.1 | 13.7× ± 3.7 | -           | -           |
| - Mg-Java             | 1.3× ± 1.3  | 1.7× ± 1.4  | -           | 0.9× ± 1.0  | 0.9× ± 1.0  | -           | -           |
| - Mg-Borneo           | 11.6× ± 4.0 | 12.0× ± 4.1 | -           | 9.4× ± 2.9  | 10.0× ± 3.2 | -           | -           |
| - Mg-P                | 14.1× ± 4.6 | 14.3× ± 4.6 | -           | 15.4× ± 4.2 | 14.3× ± 4.0 | -           | -           |
| - Mg-Brazil           | 16.6× ± 4.8 | 17.3× ± 4.5 | -           | 17.4× ± 4.5 | 17.4× ± 4.6 | -           | -           |
| <i>M. oryzae</i>      | (6,357 bp)  | -           | (6,367 bp)  | (6,153 bp)  | -           | (6,317 bp)* | (6,309 bp)  |
| - Mo-M1               | 11.2× ± 4.3 | -           | 24.2× ± 5.8 | 11.6× ± 3.1 | -           | 22.9× ± 4.5 | -           |
| - Mo-M2               | 19.2× ± 6.3 | -           | 11.8× ± 4.0 | 10.6× ± 4.1 | -           | 11.0× ± 3.5 | 10.1× ± 3.0 |

\* Excluding a repeated element (1,032 bp) in Mo-M2

170    **References**

- [1] Vurture, G.W.; Sedlazeck, F.J.; Nattestad, M.; Underwood, C.J.; Fang, H.; Gurtowski, J.; Schatz, M.C. GenomeScope: fast reference-free genome profiling from short reads. *Bioinformatics* **2017**, *33*, 2202–2204. doi:10.1093/bioinformatics/btx153.
- 175 [2] Besnard, G.; Jühling, F.; Chapuis, É.; Zedane, L.; Lhuillier, É.; Mateille, T.; Bellaïf, S. Fast assembly of the mitochondrial genome of a plant parasitic nematode (*Meloidogyne graminicola*) using next generation sequencing. *C. R. Biol.* **2014**, *337*, 295–301. doi:10.1016/j.crv.2014.03.003.
- [3] Bandelt, H.J.; Forster, P.; Röhl, A. Median-joining networks for inferring intraspecific phylogenies. *Mol. Biol. Evol.* **1999**, *16*, 37–48. doi:10.1093/oxfordjournals.molbev.a026036.
- 180 [4] Simao, F.A.; Waterhouse, R.M.; Ioannidis, P.; Kriventseva, E.V.; Zdobnov, E.M. BUSCO: Assessing genome assembly and annotation completeness with single-copy orthologs. *Bioinformatics* **2015**, *31*, 3210–3212. doi:10.1093/bioinformatics/btv351.
- [5] Somvanshi, V.S.; Tathode, M.; Shukla, R.N.; Rao, U. Nematode genome announcement: A draft genome for rice root-knot nematode, *Meloidogyne graminicola*. *J. Nematol.* **2018**, *50*, 111–116. doi:10.21307/jofnem-2018-018.
- 185 [6] Petitot, A.S.; Dereeper, A.; Agbessi, M.; da Silva, C.; Guy, J.; Ardisson, M.; Fernandez, D. Dual RNA-seq reveals *Meloidogyne graminicola* transcriptome and candidate effectors during the interaction with rice plants. *Mol. Plant Pathol.* **2016**, *17*, 860–874. doi: 10.1111/mpp.12334.
